# Supplementary material for: Development of two processes for the synthesis of bridged azabicyclic systems: intermolecular radical addition–homoallylic rearrangements leading to 2-azanorborn-5-enes and neophyl-type radical rearrangements to 2-azabenzonorbornanes
Source: Royal Society of Chemistry journal article supplement (doi:10.1039/b306717n), 2003-01-01
Supplement: b306717n.doc [file b306717n.doc]

**Development of two processes for the synthesis of bridged azabicyclic systems: intermolecular radical additionhomoallylic rearrangements leading to 2-azanorborn-5-enes and neophyl-type radical rearrangements to 2-azabenzonorbornanes**

**David M. Hodgson,**a* Magnus W. P. Bebbington*a* and Paul Willis*b***

*a*Dyson Perrins Laboratory, Department of Chemistry, University of Oxford, South Parks Road, Oxford, UK OX1 3QY. E-mail: david.hodgson@chem.ox.ac.uk

*b*AstraZeneca, R&D Charnwood, Bakewell Road, Loughborough, UK LE11 5RH.

**Electronic Experimental Supplementary Information**

The preparation and characterisation data of compounds **20b-i**, **28c-g**, **30b-g**, **30i**, **32e-g, 32i, 33b-g**.

**General details**

All reactions requiring anhydrous conditions were conducted in flame dried apparatus under an atmosphere of argon. Syringes and needles for the transfer of reagents were oven dried and allowed to cool in a desiccator over P2O5 before use. Ethers were distilled from benzophenone ketyl, hydrocarbons from CaH2, and alcohols from their magnesium alkoxides. All reactions were monitored by TLC using commercially available (Merck or Camlab) plates, pre-coated with a 0.25 mm layer of silica containing a fluorescent indicator. Visualisation of reaction components was achieved with 254 nm light, and with vanillin or KMnO4 dips. Organic layers were dried using MgSO4, evaporated with a Buchi rotary evaporator, followed by drying on a high vacuum oil pump (1 mm Hg). Column chromatography was carried out on Kieselgel 60 (40-63 m). Melting points were determined using a Gallenkamp hot stage apparatus and are uncorrected. Elemental analysis was performed by Elemental Microanalysis Limited, Okehampton, Devon, UK. IR spectra were recorded as either KBr discs or thin films, using a Perkin-Elmer 1750 FTIR spectrophotometer. Peak intensities are specified as strong (s), medium (m) or weak (w). Only selected absorbancies are reported. 1H NMR spectra of compounds were recorded in CDCl3 unless otherwise stated, using a Varian Gemini 200 (200 MHz), Bruker DPX400 (400 MHz) or AMX500 spectrometer (500 MHz). Chemical shifts () are reported relative to CHCl3 ( 7.27). Coupling constants (J) are given in Hz, multiplicities are given as multiplet (m), doublet (d), triplet (t) and quartet (q). 13C NMR spectra were recorded on the Bruker DPX400 (100 MHz) or AMX500 (125 MHz). Chemical shifts are reported relative to CDCl3 (central line of triplet  77.0) unless stated otherwise. 19F NMR spectra were recorded on a Bruker AMX 500 (235 MHz) and chemical shifts are reported relative to CFCl3 (δ = 0.0). Mass spectra were obtained from the EPSRC Mass Spectrometry Service Centre, Swansea with a Micromass, ZAB-E instrument or 900 XLT high resolution double focusing mass spectrometer with tandem ion trap. Alternatively they were recorded in-house using a VG mass Lab. TRIO1 (GCMS) or Micromass platform APCI spectrometer. All organolithiums were titrated against 2,2,2’-trimethylpropionanilide before use. A known amount of the amide was dissolved in THF (2 cm3) and the organolithium was then added to this stirring solution until a colour change is observed (clear colourless to bright orange).‘Petroleum ether’ refers to the fraction boiling in the range 30-40 oC.

**2-(*tert*-Butoxycarbonyl)-7-*syn/anti*-(phenylthio)-2-azabicyclo[2.2.1]hept-5-ene 20b**

Reaction of diene **19a** (107 mg, 0.55 mmol) and thiophenol (55 mg, 0.50 mmol) according to the general procedure for 24 h at 25 oC gave a yellow oil after removal of solvent. Column chromatography (SiO2, 15% Et2O : petroleum ether) gave **20b** as a colourless oil which then crystallised on standing to a white solid (137 mg, 92%): *R*f  (25% Et2O : petroleum ether) 0.24; mp (from petroleum ether) 50-52 oC (Found: C, 66.8; H, 7.2; N, 4.6. C17H21NO2S requires C, 67.3; H, 7.0; N, 4.6%); max(KBr)/cm-1 3068m, 2976s, 2883m, 1693s, 1583m, 1481s, 1391s, 1256s, 1155s, 1096s; H(500 MHz, 90 oC, DMSO-d6, *syn* : *anti*, 4 : 1) (*syn*-epimer)7.41-7.25 (5 H, m, 5 × CH of Ph), 6.48-6.43 (2 H, m, HC=CH), 4.49 (1 H, br s, C(1)H), 3.54 (1 H, dd, *J* 9.0 and 3.0, C(3) *exo*), 3.32 (1 H, s, C(7)H), 3.10 (1 H, s, C(4)H), 2.61 (1 H, d, *J* 9.0, C(3) *endo*), 1.42 (9 H, s, But), (*anti*-epimer) 7.41-7.25 (5 H, m, 5 × CH of Ph), 6.37-6.33 (2 H, m, HC=CH), 4.61 (1 H, s, C(1)H), 3.57 (1 H, s, C(7)H), 3.44 (1 H, dd, *J* 9.0 and 3.0, C(3)H *exo*), 3.27 (1 H, s, C (4)H), 2.59 (1 H, d, *J* 9.0, C(3)H *endo*), 1.40 (9 H, s, But); C (125 MHz, 90 oC, DMSO-d6) (both epimers) 155.8, 155.5 (both C=O), 138.8, 136.6, 136.0, 135.6, 135.2, 133.0, 131.3, 130.7, 129.9, 127.5, 127.3 (all C of Ph or C=C), 79.7 and 79.6 (both *C*Me3), 65.4 (C7), 64.8, 64.1 (both C1), 63.1 (C7), 49.2, 47.8 (both C4), 47.2, 44.3 (both C3), 29.1, 29.0 (both C*Me3*); *m/z* (CI+, NH3) 321 (M + NH4+, 3%), 304 (M + H+, 43%), 265 (70), 248 (27), 213 (10), 204 (38), 196 (17), 175 (19), 157 (68), 140 (12), 113 (34), 96 (100), 78 (24) (Found: M + H+, 304.1368. C17H22NO2S requires 304.1371).

**2-(*tert*-Butoxycarbonyl)-7-*syn/anti*-(2,6-dimethylphenylthio)-2-azabicyclo[2.2.1] hept-5-ene 20c**

Reaction of diene **19a** (97 mg, 0.50 mmol) and 2,6-dimethylbenzenethiol (62 mg, 0.45 mmol) according to the general procedure for 24 h at 20 oC gave a yellow oil after removal of solvent. Column chromatography (SiO2, 15% Et2O : petroleum ether) gave **20c** as a colourless oil (134 mg, 90%): *R*f (25% Et2O : petroleum ether) 0.25; max(thin film)/cm-1 2976m, 2927s, 2900m, 1694s, 1460s, 1392s, 1256s, 1172s, 1150s, 1103s; H (500 MHz, 90 oC, DMSO-d6, *syn* : *anti* 4 : 1) (*syn*-epimer) 7.15 (3 H, s, 3 × CH of aromatic), 6.33-6.41 (2 H, m, HC=CH), 4.32 (1 H, s, C(1)H), 3.61 (1 H, dd, *J* 9.5 3.0, C(3)H *exo*), 3.02 (1 H, s, C(7)H) superposed on H2O, 2.87 (1 H, s, C(4)H), 2.61 (1 H, d, *J* 9.5, C(3)H *endo*), 2.50 (6 H, s, 2 × Me-Ar), 1.43 (9 H, s, But), (*anti-*epimer) 7.15 (3 H, s, 3 × CH of aromatic), 6.33-6.41 (2 H, m, HC=CH), 4.42 (1 H, s, C(1)H), 3.33 (1 H, dd, 9.0 and 3.0, C(3) *exo*), 3.15 (1 H, br s, C(7)H), 3.12 (1 H, s, C(4)H), 2.54 (1 H, d, *J* 9.0, C(3)H *endo*), 2.48 (6 H, s, 2 × Me), 1.37 (9 H, s, But); C (125 MHz, 90 oC, DMSO-d6) (both epimers) 154.3, 154.0 (C=O), 142.1, 141.9, 137.4, 134.4, 133.8, 133.5, 132.8, 132.4, 131.7, 131.3, 127.8, 127.6, (all Ar or C=C), 78.3, 78.1 (both *C*Me3), 65.0, 64.2 (both C7), 63.9, 63.3 (both C1), 48.1, 46.9 (both C4), 45.8, 43.0 (both C3), 27.8, 27.5 (both C*Me3*), 21.3, 21.1 (both Me-Ar); *m/z* (CI+, NH3) 332 (M + H+, 14%), 293 (16), 276 (48), 232 (18), 215 (12), 196 (13), 157 (33), 138 (50), 122 (19), 105(35), 96 (78), 80 (20) (Found: M + H+, 332.1684. C19H26NO2S requires 332.1684).

**2-(*tert*-Butoxycarbonyl)-7-*syn/anti*-(4-nitrophenylthio)-2-azabicyclo[2.2.1]hept-5-ene 20d**

Reaction of diene **19a** (102 mg, 0.53 mmol) and *p*-nitrothiophenol54 (78 mg, 0.50 mmol) according to the standard procedure for 72 h at 20 oC gave a yellow oil. Column chromatography (SiO2, 30% Et2O : petroleum ether) gave **20d** as a yellow solid (87 mg, 50%): *R*f  (40% Et2O : petroleum ether) 0.29; mp (from Et2O) 111-113 oC (Found: C, 58.4; H, 5.9; N, 7.9. C17H20N2O4S requires C, 58.6; H, 5.8; N, 8.0 %); max(KBr)/cm-1 2978m, 2942s, 2887m, 1686s, 1594s, 1576s, 1504m, 1477s, 1381s, 1336s, 1253s, 1178s, 1156s; H (500 MHz, 90 oC, DMSO-d6, *syn* : *anti,* 7:1) (*syn*-epimer) 8.13 (2 H, d, *J* 7.5, 2 × H of *p*-nitrophenyl), 7.59 (2 H, d, *J* 7.5, 2 × H of *p*-nitrophenyl), 6.53 (1 H, s, HC=CH), 6.50 (1 H, s, HC=CH), 4.59 (1 H, s, C(1)H), 3.59 (1 H, s, C(7)H), 3.51 (1 H, dd, *J* 9.5 and 3.0, C(3)H *exo*), 3.24 (1 H, s, C(4)H), 2.64 (1 H, d, *J* 9.5, C(3)H *endo*), 1.41 (9 H, s, But), (*anti-*epimer) 8.13 (2 H, d, *J* 7.5, 2 × CH of *p*-nitrophenyl), 7.54 (2 H, d, *J* 7.5, 2 × CH of *p*-nitrophenyl), 6.39 (1 H, s, HC=CH), 6.38 (1 H, s, HC=CH), 4.71 (1 H, s, C(1)H), 3.86 (1 H, s, C(7)H), 3.54 (1 H, dd, *J* 9.5 and 3.0, C(3)H *exo*), 3.39 (1 H, s, C(4)H), 2.64 (1 H, d, *J* 9.5, C(3)H *endo*), 1.43 (9 H, s, But); C (125 MHz, 90 oC, DMSO-d6) (both epimers) 155.8 (C=O), 147.4, 146.4, 146.3, 146.1, 138.8, 136.3, 135.0, 133.3, 129.7, 129.0, 128.4, 124.7 (all C of *p*-nitrophenyl or C=C), 79.9, 79.8 (both *C*Me3), 64.7, 64.1 (both C1), 63.5, 60.7 (both C7), 49.0, 47.6 (both C4), 47.0, 44.4 (both C3), 29.0 (C*Me3*); *m/z* (EI+) 348 (M+, 35%), 292 (50), 275 (45), 231 (61), 219 (100), 199 (26), 194 (38), 189 (35), 171 (89) (Found: M+, 348.1149. C17H20N2O4S requires 348.1144).

**2-(*tert*-Butoxycarbonyl)-7-*syn/anti*-(4-methoxyphenylthio)-2-azabicyclo[2.2.1]hept-5-ene 20e**

Reaction of diene **19a** (100 mg, 0.52 mmol) and *p*-methoxybenzenethiol (63 mg, 0.45 mmol) according to the general procedure for 24 h at 20 oC gave a yellow oil. Column chromatography (SiO2, 10% Et2O : petroleum ether to 20% Et2O : petroleum ether, gradient elution) gave **20e** as a colourless oil (88 mg, 59%): *R*f (20% Et2O : petroleum ether) 0.18; max(thin film)/cm-1 3065w, 2973s, 2888m, 2835m, 1694s, 1592s, 1571m, 1495s, 1463m, 1393s, 1286s, 1246s, 1172s, 1150s, 1103s, 1031m, 886m, 867m, 844m, 829m; H (500 MHz, 90 oC, DMSO-d6, *syn* : *anti*, 2.5 : 1), (*syn-*epimer) 7.37 (2 H, d, *J* 8.0, 2 × CH of aromatic), 6.83 (2 H, d, *J* 8.0, 2 × CH of aromatic), 6.45-6.38 (2 H, m, HC=CH), 4.52 (1 H, s, C(1)H), 3.78 (3 H, s, Me-O), 3.53 (1 H, dd, *J* 9.0 and 2.0, C(3)H *exo*), 3.17 (1 H, s, C(7)H), 3.03 (1 H, s, C(4)H), 2.59 (1 H, d, *J* 9.0, C(3)H *endo*), 1.43 (9 H, s, But), (*anti*-epimer) 7.33 (2 H, d, *J* 8.5, 2 × CH of aromatic), 6.83 (2 H, d, *J* 8.0, 2 × CH of aromatic), 6.33-6.29 (2 H, m, HC=CH), 4.43 (1 H, s, C(1)H), 3.78 (3 H, s, Me-O), 3.41 (1 H, s, C(7)H), 3.38 (1 H, dd, *J*  9.5 and 2.0, C(3)H *exo*), 3.21 (1 H, s, C(4)H), 2.59 (1 H, d, *J* 9.5, C(3)H *endo*), 1.41 (9 H, s, But); C (125 MHz, 90 oC, DMSO-d6) (both epimers) 160.1, 160.0 (both aromatic C-O), 155.8, 155.4 (both C=O), 138.8, 135.8, 135.2, 134.6, 134.3, 132.8, 126.6, 125.6, 115.9 (all C=C or C of aromatic), 80.0, 79.5 (both *C*Me3), 67.0 (C7), 64.9 (C1), 64.7 (C7), 63.9 (C1), 56.2 (H3*C*-O), 49.2, 47.7 (Both C4), 47.3, 44.2 (Both C3), 29.0 (C*Me*3); *m/z* (CI+, NH3) 334 (M + H+, 12%), 295 (36), 278 (50), 234 (22), 217 (15), 162 (31), 147 (45), 124 (63), 110 (90), 96 (100) (Found: M + H+, 334.1474. C18H24NO3S requires 334.1477).

**2-(*tert*-Butoxycarbonyl)-7-*syn/anti*-(*n*-butylthio)-2-azabicyclo[2.2.1]hept-5-ene 20f**

Reaction of diene **19a** (75 mg, 0.39 mmol) and *n*-butanethiol (27 mg, 0.30 mmol) according to the general procedure for 6 h at 80 oC in toluene and removal of solvent gave a yellow oil. Column chromatography (SiO2, 15% Et2O : petroleum ether) gave **20f** as a colourless oil (50 mg, 59%): *R*f (20% Et2O : petroleum ether) 0.21; max(thin film)/cm-1 3067w, 2961s, 2931s, 2888m, 1694s, 1478m, 1456m, 1391s, 1364s, 1308m, 1256s, 1177s, 1151s, 1101s, 886m, 864m, 848m; H (500 MHz, 90 oC, DMSO-d6, *syn* : *anti,* 4:1), (*syn-*epimer) 6.45-6.39 (2 H, m, HC=CH), 4.39 (1 H, s, C(1)H), 3.43 (1 H, dd, *J* 9.0 and 3.0, C(3)H *exo*), 2.99 (1 H, s, C(4)H superposed on H2O), 2.92 (1 H, s, C(7)H), 2.59-2.46 (3 H, m, CH2-S and C(3)H *endo*), 1.60-1.48 (2 H, m, C*H2*-CH2-S), 1.41 (9 H, s, But), 1.40-1.33 (2 H, m, C*H2*-CH3), 0.94-0.86 (3 H, m, Me), (*anti-*epimer) 6.29-6.21 (2 H, m, HC=CH), 4.50 (1 H, s, C(1)H), 3.36 (1 H, dd, *J* 9.0 and 3.0, C(3)H *exo*), 3.14 (1 H, s, C(7)H), 3.12 (1 H, s, C(4)H), 2.59-2.46 (3 H, m, CH2-S and C(3)H *endo*), 1.60-1.48 (2 H, m, C*H2*-CH2-S), 1.40 (9 H, s, But), 1.40-1.33 (2 H, m, C*H2*-CH3), 0.94-0.86 (3 H, m, Me); C (125 MHz, 90 oC, DMSO-d6) (both epimers) 155.9, 155.4 (C=O), 138.9, 135.7, 135.4, 132.8 (all C=C), 80.0, 79.3 (both *C*Me3), 65.3, 64.4 (both C1), 63.7, 62.1 (both C7), 49.4, 48.0 (both C4), 47.3, 44.3 (both C3), 32.7, 32.3, 31.7 (*C*H2-CH2-S and CH2-*C*H2-S superposed), 29.0 (C*Me3*), 22.0 (*C*H2-CH3), 14.1 (CH2-*C*H3); *m/z* (EI+) 283 (M+, 18%), 227 (24), 210 (39), 194 (16), 170 (100), (Found: M+, 283.1602. C15H25NO2S requires 283.1606).

**2-(*tert*-Butoxycarbonyl)-7-*syn/anti*-(*t*-butylthio)-2-azabicyclo[2.2.1]hept-5-ene 20g**

Reaction of diene **19a** (97 mg, 0.50 mmol) and 2-methyl-2-propanethiol (43 mg, 0.47 mmol) according to the general procedure for 24 h at 80 oC in toluene and removal of solvent gave a yellow oil. Column chromatography (SiO2, 15% Et2O : petroleum ether) gave **20g** as a colourless oil (64 mg, 48%): *R*f (20% Et2O : petroleum ether) 0.21; max(thin film)/cm-1 3046w, 2965s, 2890s, 2864m, 1693s, 1475s, 1459s, 1364s, 1364s, 1328m, 1306m, 1257s, 1179s, 1154s, 1091s, 1074m, 888m, 866s, 846m; H (500 MHz, 90 oC, DMSO-d6, *syn* : *anti*, 5 : 1) (*syn-*epimer) 6.47-6.40 (2 H, m, HC=CH), 4.34 (1 H, s, C(1)H), 3.38 (1 H, dd, *J* 9.0 and 3.0, C(3)H *exo*), 2.95 (1 H, s, C(7)H), 2.93 (1 H, s, C(4)H), 2.50 (1 H, d, *J* 9.0, C(3)H *endo*), 1.42 (9 H, s, O-But) 1.31 (9 H, s, S-But); (*anti-*epimer) 6.29-6.22 (2 H, m, HC=CH), 4.48 (1 H, s, C(1)H), 3.42 (1 H, dd, *J* 9.0 and 3.0, C(3)H *exo*), 3.13 (1 H, s, C(7)H), 2.99 (1 H, s, C(4)H superposed on H2O), 2.51 (1 H, d, *J* 9.0, C(3)H *endo*), 1.41 (9 H, s, O-But), 1.28 (9 H, s, S-But); C (125 MHz, 90 oC, DMSO-d6) (both epimers) 155.8 (C=O), 139.0, 136.2, 135.5, 133.1 (all C=C), 79.5, 79.3 (both O-*C*Me3), 66.0, 65.7 (both C1), 60.3, 59.0 (both C7), 50.4, 49.2 (both C4), 47.3, 44.4 (both C3), 43.2, 42.9 (both S-*C*Me3), 32.1 32.0, (both S-C*Me3*), 29.0, 28.9 (O-C*Me3*); *m/z* (EI+) 283 (M+, 3%), 170 (10), 137 (30), 97 (72), 84 (40), 57 (100) (Found: M+, 283.1603. C15H25NO2S requires 283.1606).

**2-(*tert*-Butoxycarbonyl)-7-*syn/anti*-(3-hydroxypropylthio)-2-azabicyclo[2.2.1]hept-5-ene 20h**

Reaction of diene **19a** (100 mg, 0.52 mmol) and 3-hydroxy-1-propanethiol (63 mg, 0.45 mmol) according to the general procedure for 24 h at 80 oC in benzene and removal of solvent gave a yellow oil. Column chromatography (SiO2, Et2O) gave **20h** as a colourless oil (72 mg, 56%): *R*f (100% Et2O) 0.23; max(thin film)/cm-1 3419br s, 3065w, 2970s, 2931s, 1694s, 1532m, 1490s, 1475s, 1420s, 1393s, 1367s, 1308m, 1258s, 1149s; H (500 MHz, 90 oC, DMSO-d6, *syn* : *anti,* 4 : 1) (*syn-*epimer) 6.45-6.38 (2 H, m, HC=CH), 4.39 (1 H, s, C(1)H), 4.20-4.00 (1 H, br s, OH), 3.49 (2 H, t, *J* 7.0, CH2-OH), 3.44 (1 H, dd, *J* 9.0 and 3.0, C(3)H *exo*), 3.01 (1 H, s, C(7)H), 2.92 (1 H, s, C(4)H), 2.62-2.58 (2 H, m, CH2-S), 2.53 (1 H, d, *J* 8.0, C(3) *endo*), 1.73-1.68 (2 H, m, 2 × H of C*H2*-CH2OH), 1.42 (9 H, s, But), (*anti*-epimer) 5.90-5.85 (2 H, s, HC=CH), 4.32 (1 H, s, C(1)H), 4.20-4.00 (1 H, br s, OH), 3.55 (2 H, t, *J* 7.0, CH2OH), 3.51 (1 H, dd, *J* 9.0 and 3.0, C(3)H *exo*), 2.96 (1 H, s, C(7)H), 2.85 (1 H, s, C(4)H), 2.68-2.65 (2 H, m, CH2-S), 2.53 (1 H, d, *J* 8.0, C(3) *endo*), 1.81-1.73 (2 H, m, C*H2*-CH2-OH), 1.40 (9 H, s, But); C (125 MHz, 90 oC, DMSO-d6) (both epimers) 155.8 (C=O), 138.8, 136.2, 135.0, 131.5 (all C=C), 79.6, 78.8 (both *C*Me3), 67.9 (CH2-O), 64.9(C1), 62.0 (*C*H2-O), 60.5, 60.3 (both C7), 51.0, 47.9 (both C4), 44.9, 44.2 (both C3), 34.1, 31.7 (both CH2-S), 29.5 (C*Me3*), 29.1 (*C*-CH2-O), 28.8 (C*Me3*), 28.0 (*C*-CH2-O); *m/z* (CI+, NH3) 286 (M + H+, 25%), 247 (18), 230 (90), 196 (17), 157 (87), 140 (46), 94 (100), 80 (18), 56 (32) (Found: M + H+, 286.1478. C14 H24NO3S requires 286.1477).

**2-(Methoxycarbonyl)-7-*syn/anti*-(*p*-tolylthio)-2-azabicyclo[2.2.1]hept-5-ene 20i**

Reaction of diene **19b** (85 mg, 0.56 mmol) and *p*-thiocresol (66 mg, 0.53 mmol) according to the general procedure for 4 h at 20 oC gave a yellow oil. Column chromatography (SiO2, 30% Et2O : petroleum ether) gave **20i** as a colourless oil (96 mg, 66%): Rf  (30% Et2O : petroleum ether) 0.27; max(thin film)/cm-1 3068m, 2952m, 2887m, 1694s, 1492m, 1447s, 1386s, 1324m, 1305m, 1263m, 1190m, 1151m, 1106s; H (500 MHz, 90 oC, DMSO-d6, *syn* : *anti*, 4 : 1) (*syn*-epimer) 7.30 (2 H, d, *J* 8.0, 2 × CH of aromatic), 7.16 (2 H, d, *J* 8.0, 2 × CH of aromatic), 6.48-6.45 (1 H, m, HC=CH), 6.43-6.40 (1 H, m, HC=CH), 4.52 (1 H, s, C(1)H), 3.62 (3 H, s, Me-O), 3.60 (1 H, dd, *J* 9.5 and 3.0, C(3)H *exo*), 3.28 (1 H, s, C(7)H), 3.10 (1 H, br s, C(4)H), 2.65 (1 H, d, *J* 9.5, C(3)H *endo*), 2.30 (3 H, s, Me-Ar), (*anti*-epimer) 7.27 (2 H, d, *J* 8.0, 2 × CH of aromatic), 7.15 (2 H, d, *J* 8.0, 2 × CH of aromatic), 6.37-6.34 (1 H, m, HC=CH), 6.33-6.30 (1 H, m, HC=CH), 4.62 (1 H, s, C(1)H), 3.59 (3 H, s, Me-O), 3.53 (1 H, s, C(7)H), 3.48 (1 H, dd, *J* 9.0 and 3.0, C(3)H *exo*), 3.27 (1 H, s, C(4)H), 2.61 (1 H, d, *J* 9.0, C(3)H *endo*), 2.30 (3 H, s, Me-Ar); C (125 MHz, 90 oC, DMSO-d6) (both isomers) 156.7, 156.2 (both C=O), 139.0, 137.5, 137.3, 136.2, 135.3, 132.9, 132.7, 131.9, 131.7, 131.5, 130.6 (all C=C or C of aromatic), 66.1, 65.0 (both C7), 64.3, 63.7 (both C1), 52.8 (H3C-O), 49.1, 47.8 (both C4), 47.1, 44.2 (both C3), 21.3 (H3C-Ar); *m/z* (CI+, NH3) 276 (M + H+, 3%), 154 (25), 108 (11), 52 (100) (Found: M + H+, 276.1053. C15H18NO2S requires 276.1058).

***N*-(*tert*-Butoxycarbonyl)-2-ethyl-1,4-dihydro-1,4-iminonaphthalene 28c**

Magnesium turnings (272 mg, 11.2 mmol) were added to dry THF (5 cm3) under argon and stirred with 1,2-dibromoethane (60 L) for 10 min. A solution of pyrrole **37** (2.0 g, 10.3 mmol) in THF (15 cm3) was added and the mixture brought to reflux. One quarter of a solution of *o*-bromofluorobenzene (1.79 g, 10.2 mmol) in THF (5 cm3) was added. When initiation occurred (darkening), the rest of the solution was added dropwise. After the addition was complete the mixture was allowed to reflux for a further 90 min. It was then allowed to cool, quenched with a solution of NH4Cl (6.0 g) in water (20 cm3) and the aqueous layer extracted with Et2O (3 × 50 cm3), dried (MgSO4) and the solvent removed at reduced pressure. Chromatography (SiO2, 10% Et2O : petroleum ether to 20% Et2O : petroleum ether, gradient elution) gave **28c** as a yellow oil (1.54 g, 54 %): *R*f (30% Et2O : petroleum ether) 0.63; max(thin film)/cm-1 3051m, 3025m, 2972s, 2934s, 2877s, 1713s, 1620w, 1478m, 1456s, 1392s, 1368s, 1332s, 1253s, 1169s, 1079s, 1036w, 1008w, 958w, 928m, 893m, 861s, 831s, 809s, 751s; H (500 MHz, 90 oC, DMSO-d6) 7.34-7.30 (1 H, m, CH of aromatic), 7.28-7.24 (1 H, m, CH of aromatic), 6.98-6.90 (2 H, m, 2 × CH of aromatic), 6.42 (1 H, s, C(3)H), 5.39 (1 H, s, C(1)H), 5.21 (1 H, s, C(4)H), 2.35 (2 H, m, 2 × H of CH2), 1.35 (9 H, s, But), 1.00 (3 H, t, *J* 7.0, Me); C (125 MHz, 90 oC, DMSO-d6) 160.4 (C2), 155.4 (C=O), 150.2, 149.4 (C(quat.) of aromatic, 134.1 (C3), 125.5, 125.1, 121.2, 120.7 (4 x C of aromatic), 80.2 (CMe3), 69.6, 67.5 (C1 and C4), 28.7 (C*Me3*), 23.1 (CH2), 12.2 (Me); *m/z* (TOF ES+) 272 (M + H+, 3%), 257 (M + H+ – CH3, 100), 248 (10), 216 (33), 198 (42), 155 (28) (Found: M + H+, 272.1656. C17H22NO2 requires 272.1651).

***N*-(*tert*-Butoxycarbonyl)-1,3-dimethyl-1,4-dihydro-1,4-iminonaphthalene 28d**

Magnesium turnings (406 mg, 16.7 mmol) were added to dry THF (7 cm3) under argon and stirred with 1,2-dibromoethane (100 L) for 10 min. A solution of pyrrole **38** (3.0 g, 15.3 mmol) in THF (25 cm3) was added and the mixture brought to reflux. One quarter of a solution of *o*-bromofluorobenzene (2.68 g, 15.2 mmol) in THF (7 cm3) was added. When initiation occurred (darkening), the rest of the solution was added dropwise. After the addition was complete the mixture was allowed to reflux for a further 90 min. It was then allowed to cool, quenched with a solution of NH4Cl (9 g) in water (30 cm3) and the aqueous layer extracted with Et2O (3 × 50 cm3), dried (MgSO4) and the solvent removed at reduced pressure. Chromatography (SiO2, 10% Et2O : petroleum ether) gave **28d** as a yellow oil (2.37 g, 57%): *R*f (25% Et2O : petroleum ether) 0.55; max(thin film)/cm-1 3067m, 3050m, 3006s, 2974s, 2931s, 2869s, 1713s, 1642m, 1629m, 1478s, 1455s, 1366s, 1336s, 1292s, 1254s, 1169s, 1093s, 1073s, 1058s, 1030s, 1007m, 851s, 833s, 809s, 749s; H (400 MHz) 7.29 (1 H, d, *J* 7.0, 1 x CH of aromatic), 7.15 (1 H, d, *J* 7.0, 1 × CH of aromatic), 7.05-6.90 (2 H, m, 2 × CH of aromatic), 6.12 (1 H, s, C(2)H), 5.12 (1 H, s, C(4)H), 2.10 (3 H, s, 3-Me), 1.89 (3 H, s, 1-Me), 1.38 (9 H, s, But); C (100 MHz), 155.5 (C=O), 153.9, 152.3 (2 × C(quat) of aromatic), 148.7 (C3), 139.1 (C2), 125.0, 124.4, 120.2, 118.2 (4 × C of aromatic), 80.2 (*C*Me3), 74.2, 70.7 (C1 and C4), 28.2 (C*Me*3), 15.2 (Me), 14.9 (Me); *m/z* (CI+, NH3) 272 (M + H+, 1%), 233 (100), 216 (17), 172 (M –Boc+, 34) (Found: M + H+, 272.1648. C17H22NO2 requires 272.1651).

***N*-(*tert*-Butoxycarbonyl)-6,7-dimethoxy-1,4-dihydro-1,4-iminonaphthalene 28e**

To a solution of *N*-Boc pyrrole (1.5 g, 9.0 mmol) in acetonitrile (60 cm3) were simultaneously added solutions of 4,5-dimethoxyanthranilic acid (1.48 g, 7.5 mmol) in CH2Cl2 (35 cm3) and isoamyl nitrite (1.76 g, 15 mmol) in acetonitrile (30 cm3) over 30 min. The solution was brought to reflux and heated for 2 h, and after cooling the solvent was removed at reduced pressure. Chromatography (SiO2, 30% Et2O : petroleum ether to 50% Et2O : petroleum ether, gradient elution) gave **28e** as a yellow gum (924 mg, 41%): *R*f (30% Et2O : petroleum ether) 0.16; max(thin film)/cm-1 3079m, 2971s, 2932s, 2866s, 2833s, 1704s, 1604m, 1556w, 1480s, 1410s, 1392s, 1368s, 1318s, 1291s, 1258s, 1214s, 1162s, 1089s, 1062s, 1022s, 979m, 942w, 869m, 834m, 787m ; H (400 MHz, mixture of rotamers observed) 7.01 and 6.96 (4 H, 2 × s, 2 × CH of aromatic, C(2)H and C(3)H), 5.46 and 5.42 (2 H, 2 × s, C(1)H and C(4)H), 3.84 (6 H, s, 2 × Me), 1.38 (9 H, s, tBu); C (125 MHz, 90 oC, DMSO) 154.9 (C=O), 147.0, 144.0, 142.5 (all C of aromatic), 110.2 (C2 and C3), 80.4 (*C*Me3), 67.1(C1 and C4), 57.7 ( 2 × Me-O), 29.0 (C*Me*3); *m/z* (CI+, NH3) 304 (M + H+, 4%), 265 (55), 248 (100), 204 (91), 189 (69), 177 (19), 58 (10) (Found: M + H+, 304.1546. C17H22NO4 requires 304.1549).

***N*-(*tert*-Butoxycarbonyl)-6,7-difluoro-1,4-dihydro-1,4-iminonaphthalene 28f**

To a solution of *N*-Boc pyrrole (0.967 g, 5.8 mmol) in THF (20 cm3) at reflux were simultaneously added solutions of 4,5-difluoroanthranilic acid (1.0 g, 5.8 mmol) in THF (10 cm3) and isoamyl nitrite (0.75 g, 6.4 mmol) in THF (10 cm3) over 30 min. The mixture was allowed to reflux for 1 h after the end of the addition, then allowed to cool. Water (40 cm3) was added and the aqueous layer extracted with Et2O (3 × 50 cm3), the combined organic extracts dried (MgSO4) and the solvent was removed at reduced pressure. Chromatography (SiO2, 20% Et2O : petroleum ether) gave **28f** as a yellow solid (330 mg, 20%): *R*f (25% Et2O : petroleum ether) 0.31; mp (from Et2O) 69-70 oC (Found: C, 64.3; H, 5.4; N, 5.0. C15H15F2NO2 requires C, 64.5; H, 5.4; N, 5.0%); max(KBr)/cm-1 3039m, 3006m, 2983s, 2934m, 1697s, 1466s, 1367s, 1345s, 1269sm 1249s, 1187s, 1168s, 1127s, 1102s, 1089s, 873s, 838s, 764s; H (500 MHz, 90 oC, DMSO-d6), 7.40-7.33 (2 H, m, 2 × CH of aromatic), 7.04 (2 H, s, C(2)H and C(3)H), 5.43 (2 H, s, C(1)H and C(4)H), 1.34 (9 H, s, But); C (125 MHz, 90 oC, DMSO-d6) 154.9 (C=O), 148.2 (2 × CF), 146.4 (2 × C of aromatic), 143.9 (2 × C of aromatic) 112.1 (C2 and C3), 81.0 (*C*Me3), 66.8 (C1 and C4), 28.0 (C*Me*3); F (235 MHz, 25 oC) 142.9 and 142.8 (split by rotamers); *m/z* (CI+, NH3) 280 (M + H+, 15%), 180 (M + H – Boc+, 100), 164 (55), 153 (12) (Found: M + H+, 280.1162. C15H16F2NO2 requires 280.1149).

***N*-(*tert*-Butoxycarbonyl)-1,4-dihydro-1,4-iminoanthracene 28g**46

A solution of *N*-Boc pyrrole (2.45 cm3, 14.7 mmol) in dioxan (12.5 cm3) was brought to reflux and solutions of isoamyl nitrite (1.97 cm3, 14.7 mmol) in dioxan (6.25 cm3) and 3-amino-2-naphthoic acid (2.5 g of 80% tech. grade, 13.3 mmol) in dioxan (20 cm3) were added using separate syringes over 2.5 h. The blood-red mixture was allowed to reflux for a further 90 minutes, then allowed to cool. The solvent was removed at reduced pressure to give a red oil. Column chromatography (Biotage system, 20% Et2O : isohexane) gave the product **28g** as a white solid (1.54 g, 39% yield, 49% assuming 80% pure acid, lit.46 49%): *R*f (Et2O) 0.80; H (400 MHz, CDCl3) 7.72-7.67 (2 H, m, 2 × CH of aromatic), 7.60 (2 H, s, 2 × CH of aromatic), 7.43-7.39 (2 H, m, 2 × CH of aromatic), 6.91 (2 H, br s, 2 × HC=C), 5.57 (2 H, br s, C(1)H and C(4)H), 1.37 (9 H, s, But); *m/z* (CI+, NH3) 294 (M + H+, 19%), 255 (100), 238 (60), 194 (88), 179 (15) (Found: M + H+, 294.1490. C19H20NO2 requires 294.1494).

***N*-(Methoxycarbonyl)-*exo*-1,2,3,4-tetrahydro-1,4-iminonaphthalen-2-ol 30b**

Racemic BINAP (31.0 mg, 50 mol) and [Rh(COD)Cl]2 (12.3 mg, 25 mol), were placed in a flame-dried flask under argon. Toluene (5 cm3) was added and the solution was stirred for 10 min. A solution of alkene **28b** (500 mg, 2.5 mmol) in toluene (5 cm3) was added and the solution cooled to 78 oC then stirred for 10 min. Catecholborane (595 mg, 5.0 mmol) was added and the mixture stirred for a further 30 min, then allowed to warm to 25 oC and stirred for 3 h. The flask was then cooled to 0 oC and EtOH (2.5 cm3) was added followed by H2O2 (2.0 cm3 of a 35% aq. solution) and aqueous NaOH (5.0 cm3 of a 2 M solution) dropwise over 5 min. The reaction was removed from the ice bath and then stirred at 25 oC for 16 h. The mixture was diluted with 1 M NaOH (30 cm3) and extracted with Et2O (3 × 50 cm3). The combined extracts were washed with 1 M NaOH (60 cm3) and water (60 cm3), dried (MgSO4) and the solvent removed at reduced pressure to give an oil. Column chromatography (SiO2, 80% Et2O : petroleum ether to 100% Et2O, gradient elution) gave the alcohol **30b** as a colourless oil that crystallised on standing to a white solid (305 mg, 56%): mp (from Et2O) 82-83 oC; *R*f (Et2O) 0.31; max(thin film)/cm-1 3424 br s, 3025m, 2982m, 2953s, 1694s, 1447s, 1367s, 1290s, 1252s 1195s, 1167s, 1102s, 1055s, 967m, 921m, 756s, 733s; H (400 MHz) 7.29-7.23 (1 H, m, CH of aromatic), 7.20-7.15 (1 H, m, CH of aromatic), 7.14-7.08 (2 H, m, 2 × CH of aromatic), 5.19 (1 H, s, C(1)H), 5.07 (1 H, s, C(4)H), 4.03-3.99 (1 H, m, C*H*-OH), 3.63 (3 H, s, Me-O), 3.26 (1 H, br s, OH), 1.90-1.82 (2 H, m, CH2); C (100 MHz) 157.0 (C=O), 146.1, 141.3 (both C(quat)), 127.2, 126.6, 121.3, 119.7 (4 × C of aromatic), 72.8 (CH-O), 68.9 (C1), 60.6 (C4), 52.7 (MeO), 39.5 (C3); *m/z* (CI+, NH3), 237 (M + NH4+, 40%), 220 (M + H+, 100), 175 (12) (Found: M + H+, 220.0970. C12H14NO3 requires 220.0973).

***N*-(*tert*-Butoxycarbonyl)-*endo*-(3-ethyl)-*exo*-1,2,3,4-tetrahydro-1,4-iminonaphthalen-2-ol 30c**

9-BBN (4.5 cm3 of 0.5 M solution in THF, 2.25 mmol) was added to alkene **28c** (308 mg, 1.13 mmol) under argon. The reaction was stirred at 25 oC for 24 h. It was then cooled to 0 oC and H2O2 (2.5 cm3 of a 35% aqueous solution) was added, followed by NaOH (3.3 cm3 of a 2 M solution). The mixture was allowed to warm to 25 oC and stirred for 5 h. The aqueous layer was saturated with K2CO3 and extracted with Et2O (3 × 25 cm3), the combined organic extracts dried (MgSO4) and the solvent removed at reduced pressure. Chromatography (30% Et2O : petroleum ether to 40% Et2O : petroleum ether) gave **30c** as a colourless gum (145 mg , 44%): *R*f (50% Et2O : petroleum ether) 0.23; max(thin film)/cm-1 3418 br s, 2970s, 2930s, 2890s, 1682s, 1470s, 1392s, 1249s, 1165s, 1110s, 1055s, 1012s, 903s, 753s; H (400 MHz) 7.27-7.17 (2 H, m, 2 × CH of aromatic), 7.14-7.08 (2 H, m, 2 × CH of aromatic), 4.95 and 4.93 (2 H, 2 × s, C(1)H and C(4)H), 3.38 (1 H, d, *J* 2.0, CH-O), 3.05-2.75 (1 H, br s, OH), 2.06-2.00 (1 H, m, C(3)H), 1.36 (9 H, s, But), 1.02-0.91 (1 H, m, H of CH2), 0.90 (3 H, t, *J* 7.0, Me), 0.78-0.68 (1 H, m, H of CH2); C (100 MHz) 156.6 (C=O), 143.3, 141.6 (both C(quat)) 126.7, 126.5, 121.0, 120.4 (4 × C of aromatic), 80.4 (*C*Me3), 79.2 (C2), 69.4, 64.1 (C1 and C4), 52.7 (C3), 29.2 (C*Me*3), 24.0 (CH2), 12.2 (Me); *m/z* (TOF ES+) 290 (M + H+, 20%), 275, (M + H-CH3+, 15), 234 (21), 216 (100), 198 (16), 190 (M+H-Boc+, 25), 173 (39) (Found: M + H+, 290.1756. C17H24NO3 requires 290.1756).

***N*-(*tert*-Butoxycarbonyl)-*endo*-(1,3-dimethyl)-*exo*-1,2,3,4-tetrahydro-1,4-iminonaphthalen-2-ol 30d**

9-BBN (7.4 cm3 of a 0.5 M solution in THF, 3.7 mmol) was added to neat alkene **28d** (500 mg, 1.84 mmol) under argon at 25 oC. The mixture was stirred for 24 h, then cooled to 0 oC. H2O2 (3.9 cm3 of a 35% aq. solution) was added dropwise, followed by NaOH (5.25 cm3 of a 2 M aq. solution). The aqueous layer was saturated with K2CO3, and extracted with Et2O (3 × 20 cm3), the combined organic extracts dried (MgSO4) and the solvent removed at reduced pressure. Chromatography (SiO2, 30% Et2O : petroleum ether to 50% Et2O : petroleum ether, gradient elution) gave **30d** as a white solid (340 mg, 64 %): *R*f (50% Et2O : petroleum ether) 0.19; mp (from Et2O) 86-88 oC; max(thin film)/cm-1 3414s, 2977s, 2963s, 2930m, 2884m, 1659s, 1458s, 1381s, 1253m, 1175s, 1116m, 1056m, 863s, 751s; H (400 MHz) 7.20-7.07 (4 H, m, 4 × CH of aromatic), 4.85 (1 H, d, *J* 4.0, C(4)H), 3.07 (1 H, d, *J* 4.0, CH-O), 2.41 (1 H, d, *J* 7.0, OH), 2.15-2.07 (1 H, m, C(3)H), 1.94 (3 H, s, 1-Me), 1.38 (9 H, s, But), 0.67 (3 H, d, *J* 7.0, 3-Me); C (100 MHz) 156.4 (C=O), 145.3, 143.1 (2 × C(quat) of aromatic), 126.7, 126.4, 121.7, 119.2 (4 × C of aromatic), 83.8 (*C*H-O), 80.1 (*C*Me3), 73.1 (C1), 65.3 (C4), 44.6 (C2), 28.3 (C*Me3*), 15.5 (3-Me), 13.1 (1-Me); *m/z* (TOF ES-) 288 (M – H+, 42%), 283 (15), 269 (12), 265 (12), 239 (23), 232 (100), 214 (48), 212 (35), 202 (20), 199 (13), 157 (21) (Found: M – H+, 288.1598, C17H22NO3 requires 288.1600).

***N*-(*tert*-Butoxycarbonyl)-6,7-dimethoxy-*exo*-1,2,3,4-tetrahydro-1,4-iminonaphthalen-2-ol 30e**

9-BBN (10.9 cm3 of a 0.5 M solution in THF, 5.45 mmol) was added to alkene **28e** (830 mg, 2.73 mmol) under argon at 25 oC. The mixture was stirred for 24 h, then cooled to 0 oC. H2O2 (5.8 cm3 of a 35% aq. solution) was added dropwise, followed by NaOH (7.8 cm3 of a 2 M aq. solution). The aqueous layer was saturated with K2CO3, and extracted with Et2O (3 × 30 cm3), the combined organic extracts were dried (MgSO4) and the solvent removed at reduced pressure. Chromatography (SiO2, Et2O) gave **30e** as a colourless gum (490 mg, 56%): *R*f (50% EtOAc : petroleum ether) 0.44; max(thin film)/cm-1 3428s, 2978s, 2939s, 1690s, 1492s, 1466s, 1367s, 1307s, 1251s, 1214s, 1159s, 1095s, 1055s, 912s, 733s; H (400 MHz) 6.87 (1 H, s, CH of aromatic), 6.80 (1 H, s, CH of aromatic), 5.01 (1 H, s, C(1)H), 4.91 (1 H, s, C(4)H), 3.92 (1 H, s, CH-O), 3.83 and 3.82 (6 H, 2 × s, 2 × MeO), 2.90 (1 H, br s, OH), 1.84-1.79 (2 H, m, C(3)H), 1.36 (9 H, s, But); C (100 MHz) 156.5 (C=O), 148.1, 147.5, 138.7, 133.5 (4 × C(quat) of aromatic), 105.9, 104.5 (2 × C of aromatic), 80.4 (*C*Me3), 73.2 (*C*H-O), 69.0 (C1), 61.0 (C4), 56.2 and 56.1 (2 x MeO), 40.1 (C2), 28.3 (C*Me3*); *m/z* (TOF ES+) 344 (M + Na+, 6%), 329 (M – Me + Na+, 12), 322 (M + H+, 13%), 289 (17), 266 (14), 248 (64), 205 (100), (Found: M + Na+, 344.1474. C17H23NNaO5 requires 344.1485).

***N*-(*tert*-Butoxycarbonyl)-6,7-difluoro-*exo*-1,2,3,4-tetrahydro-1,4-iminonaphthalen-2-ol 30f**

9-BBN (6.4 cm3 of a 0.5 M solution in THF, 3.2 mmol) was added to neat alkene **28f** (450 mg, 1.6 mmol) under argon at 25 oC. The mixture was stirred for 24 h, then cooled to 0 oC. H2O2 (3.4 cm3 of a 35% aq. solution) was added dropwise, followed by NaOH (4.6 cm3 of a 2 M aq. solution). The aqueous layer was saturated with K2CO3, extracted with Et2O (3 × 20 cm3), the combined organic extracts dried (MgSO4) and the solvent removed at reduced pressure. Chromatography (SiO2, 50% Et2O : petroleum ether to 100% Et2O, gradient elution) gave **30f** as a white solid (235 mg, 49%): *R*f (Et2O) 0.59; mp (from Et2O) 115-116 oC; max(KBr)/cm-1 3259s, 3028m, 2985s, 2963s, 1694s, 1615m, 1482s, 1350s, 1301m, 1271m, 1254m, 1170s, 1089m, 1071m, 1041m, 803m; H (400 MHz) 7.11 (1 H, dd, *J* 9.0 and 7.0, CH of aromatic), 7.03 (1 H, dd, *J* 9.0 and 7.0, CH of aromatic), 5.06 (1 H, s, C(1)H), 4.96 (1 H, s, C(4)H), 3.96-3.92 (1 H, m, CH-O), 3.00-2.65 (1 H, br s, OH), 1.87-1.84 (2 H, m, CH2), 1.37 (9 H, s, But); C (100 MHz) 156.2 (C=O), 149.3 (dd, *J* 246 and 13, C-F), 148.9 (dd, 245 and 13, C-F), 142.3 (C(quat) of aromatic), 137.5 (C(quat) of aromatic), 111.3 (d, *J* 19, C of aromatic), 109.8 (d, *J* 19, C of aromatic), 81.0 (*C*Me3), 72.6 (*C*H-O), 68.5 (C1), 60.6 (C4), 39.3 (C3), 28.3 (C*Me3*); 19F (235 MHz) 139.3 (1 F, d, *J* 19, CF), 140.2 (1 F, d, *J* 19, CF); *m/z* (TOF CI+) 298 (M + H+, 52%), 242 (10), 198 (100), 153 (30) (Found: M + H+, 298.1246. C15H18F2NO3 requires 298.1255).

***N*-(*tert*-Butoxycarbonyl)-*exo*-1,2,3,4-tetrahydro-1,4-iminoanthracen-2-ol 30g**

9-BBN (6.8 cm3 of 0.5 M solution in THF, 3.4 mmol) was added dropwise to a stirred solution of alkene **28g** (500 mg, 1.70 mmol) in THF (5 cm3) at 0 oC. The solution was allowed to warm to room temperature and stirred for 16 h. The flask was then cooled to 0 oC and H2O2 (2.0 cm3 of a 35% aq. solution) was added, followed by NaOH (3.0 cm3 of a 2 M aq. solution). The reaction was then stirred at 25 oC for 5 h. The aqueous layer was saturated with K2CO3, and extracted with Et2O (3 × 30 cm3). The combined extracts were dried (MgSO4) and the solvent removed at reduced pressure to give an oil. Chromatography (SiO2, 40% Et2O : petroleum ether to 60% Et2O : petroleum ether, gradient elution) gave the alcohol **30g** as a white solid (311 mg, 59%): *R*f (50% Et2O : petroleum ether) 0.21; mp (from Et2O) 177-178 oC; max(KBr)/cm-1 3512 br s, 2985m, 2919m, 1670s, 1391s, 1370m, 1165m, 1097m, 1046m, 888m, 749m ; H (500 MHz) 7.81-7.77 (2 H, m, 2 × CH of aromatic), 7.70 (1 H, s, CH of aromatic), 7.60 (1 H, s, CH of aromatic), 7.50-7.44 (2 H, m, 2 × CH of aromatic), 5.25 (1 H, br s, C(1)H), 5.15 (1 H, br s, C(4)H), 4.10 (1 H, br s, C*H*-OH), 2.9-2.6 (1 H, br s, OH), 2.00 (2 H, m, CH2), 1.39 (9 H, s, But); C (125 MHz), 156.5 (C=O), 143.6, 139.1, 132.5, 132.8, 128.1, 128.0, 125.9, 125.7, 120.0, 117.6 (10 × C of aromatic), 80.6 (*C*Me3), 73.2 (C-OH), 68.7 (C1), 60.2 (C4), 40.5 (C3), 28.1 (C*Me3*); *m/z* (CI+, NH3) 312 (M + H+, 52%), 212 (M – Boc+,100), 194 (11) 167 (21) (Found: M + H+, 312.1597. C19H22NO3 requires 312.1599).

***N*-(*tert*-Butylcarbonyl)-*exo*-1,2,3,4-tetrahydro-1,4-iminonaphthalen-2-ol 30i**

Racemic BINAP (19.6 mg, 32 mol) and [Rh(COD)Cl]2 (7.8 mg, 16 mol), were placed in a flame-dried flask under argon. THF (3.5 cm3) was added and the solution was stirred for 10 min. A solution of alkene **28i** (360 mg, 1.6 mmol) in THF (3.5 cm3) was added and the solution cooled to 78 oC and stirred 10 min. Catecholborane (383 mg, 3.2 mmol) was added and the mixture stirred for a further 30 min, then allowed to warm to 25 oC and stirred for 3 h. The mixture was then cooled to 0 oC and EtOH (1.5 cm3) was added followed by H2O2 (1.5 cm3 of a 35% aq. solution) and then aqueous NaOH (1.7 cm3 of a 2 M solution) dropwise over 5 min. The reaction was then stirred at 25 oC for 16 h. The mixture was diluted with 1 M NaOH (10 cm3) and extracted with Et2O (3 × 20 cm3). The combined extracts were washed with 1 M NaOH (30 cm3) and water (30 cm3), dried (MgSO4) and the solvent removed at reduced pressure to give an oil. Column chromatography (80% Et2O : petroleum ether to 100% Et2O, gradient elution) gave the alcohol **30i** as a white solid (220 mg, 57%): *R*f (Et2O) 0.33; mp (from Et2O) 138-139 oC; max(thin film)/cm-1 3340 br s, 2968s, 2907s, 1622s, 1574s, 1476m, 1451m, 1417s, 1363m, 1325m, 1209w, 1159m, 1088m, 1050m, 753m; H (400 MHz) 7.33-7.28 (1 H, m, CH of aromatic), 7.22-7.18 (1 H, m, CH of aromatic), 7.16-7.10 (2 H, m, 2 × CH of aromatic), 5.53 (1 H, br s, C(1)H), 5.47 (1 H, br s, C(4)H), 4.07 (1 H, s, C*H*-OH), 3.45 (1 H, br s, OH), 1.96-1.82 (2 H, m, CH2), 1.24 (9 H, s, But); C (100 MHz) 176.3 (C=O), 146.0, 141.3 (both C(quat)), 127.2, 126.6, 121.0, 119.4 (4 x C of aromatic), 72.8 (CH-O), 68.1 (C1), 60.3 (C4), 39.4 (C3), 38.8 (*C*Me3), 27.8 (C*Me3*); *m/z* (CI+, NH3), 246 (M + H+, 100%) 118 (12), 102 (14) (Found: M + H+, 246.1492. C15H20NO2 requires 246.1494).

***N*-(*tert*-Butoxycarbonyl)-6,7-dimethoxy-1,2,3,4-tetrahydro-1,4-iminonaphthalene 32e by hydrogenation**

Alkene **28e** (100 mg, 0.33 mmol) was dissolved in MeOH (5 cm3), and 10% Pd/C (35 mg, 0.033 mmol Pd) was added. The mixture was placed under 1 atm of hydrogen for 10 min at 25 oC using a balloon. The flask was then opened to the atmosphere and the mixture filtered through a celite pad. The solvent was removed at reduced pressure to give an spectroscopically pure **32e** as an oil (74 mg, 73%) without the need for chromatography: *R*f (40% Et2O : petroleum ether) 0.24; max(thin film)/cm-1 2976s, 2872s, 2833s, 1694s, 1614s, 1502s, 1454s, 1392s, 1256s, 1220s, 1168s, 1099s, 969s, 910s; H (400 MHz) 6.83 (2 H, s, 2 × CH of aromatic), 5.03 (2 H, s, C(1)H and C(4)H), 3.83 (6 H, s, 2 × Me-O), 2.05 (2 H, d, *J* 7.0, 2 × CH *exo*), 1.37 (9 H, s, But), 1.21 (2 H, d, *J* 7.0, 2 × CH *endo*); C (100 MHz) 155.2 (C=O), 147.5 (2 × C(quat)), 137.1 (2 × C of aromatic), 104.3 (2 × C of aromatic), 79.9 (*C*Me3), 61.4 (C1 and C4), 56.1 (2 × Me-O), 28.2 (C*Me3*), 27.1 (C2 and C3); *m/z* (CI+, NH3) 306 (M + H+, 5%), 250 (35), 221 (12), 206 (39), 189 (100), 177 (38) (Found: M + H+, 306.1697. C17H24NO4 requires 306.1705).

***N*-(*tert*-Butoxycarbonyl)-6,7-difluoro-1,2,3,4-tetrahydro-1,4-iminonaphthalene 32f**

Hydrogenation of alkene **28f** (100 mg, 0.36 mmol) on 10% Pd/C in MeOH in the manner as described above for 10 min gave spectroscopically pure **32f** without the need for chromatography as a colourless oil that crystallised on standing to a white solid (83 mg, 82%): mp (from Et2O) 78-80 oC; max(KBr)/cm-1 3061m, 3028m, 2986s, 2955m, 1691s, 1478s, 1456m, 1373s, 1350m, 1279s, 1258m, 1166s, 1108s, 1086m, 1066m, 912m, 788s; H (400 MHz) 7.05 (2 H, t, *J* 8.0, 2 × CH of aromatic), 5.07 (2 H, s, C1 and C4), 2.10 (2 H, d, *J* 8.0, 2 × CH *exo*), 1.38 (9 H, s, But), 1.25 (2 H, d, *J* 8.0, 2 × CH *endo*); C (100 MHz) 155.1 (C=O), 148.9 (dd, *J* 247 and 15, 2 × CF), 140.9 (2 × C of aromatic), 109.4 (2 × C of aromatic), 80.4 (*C*Me3), 60.8 (C1 and C4), 28.1 (C*Me3*), 26.6 (C2 and C3); F (235 MHz) 141.0; *m/z* (CI+, NH3) 282 (M + H+, 26%), 182 (100), 153 (40) (Found: M + H+, 282.1298. C15H18F2NO2 requires 282.1306).

***N*-(*tert*-Butoxycarbonyl)-1,2,3,4-tetrahydro-1,4-iminoanthracene 32g**46

10% Pd/C (36 mg, 0.034 mmol Pd) was added to a stirred solution of alkene **28g** (100 mg, 0.34 mmol) in MeOH (3 cm3). The mixture was hydrogenated at 1 atm H2 using a balloon for 10 min, after which time the flask was opened to the atmosphere and the mixture filtered through a pad of celite. Removal of the solvent at reduced pressure gave the spectroscopically pure **32g** as a pale yellow oil (84 mg, 83%, lit.46 84%): H (200 MHz) 7.82 (2 H, m, 2 × CH of aromatic), 7.66 (2 H, s, 2 × CH of aromatic), 7.46 (2 H, m, 2 × CH of aromatic), 5.26 (2 H, s, C(1)H and C(4)H), 2.22 (2 H, d, *J* 8, 2 × CH *exo*), 1.44 (2 H, m, 2 × CH *endo*),1.39 (9 H, s, But); in accordance with the literature.

***N*-(*tert*-Butylcarbonyl)-1,2,3,4-tetrahydro-1,4-iminonapthalene 32i** **by hydrogenation**

Alkene **28i** (100 mg, 0.44 mmol) was dissolved in MeOH (4 cm3) and 10% Pd/C (47 mg, 0.044 mmol Pd) was added. The mixture was placed under 1 atm of hydrogen for 10 min at 25 oC using a balloon. The flask was then opened to the atmosphere and the mixture filtered through a celite pad. The solvent was removed at reduced pressure to give a solid. Chromatography (30% Et2O : petroleum ether) gave the compound **32i** as a white solid (97 mg, 96%); *R*f (30% Et2O : 70 % petroleum ether) 0.30; mp (from Et2O/petroleum ether) 128-129 oC; max(KBr)/cm-1 3021w, 2985m, 2947m, 2873w, 1619s, 1477m, 1451m, 1415m, 1362m, 1216m, 1164m, 1104m, 883m, 844m, 765m; H (500 MHz) 7.28-7.21 (2 H, m, 2 × CH of aromatic), 7.16-7.11 (2 H, m, 2 x CH of aromatic), 5.53 (2 H, s, C(1)H and C(4)H), 2.18-2.07 (2 H, m, 2 × CH *exo*), 1.34 (2 H, d, *J* 7.0, 2 × CH *endo*), 1.20 (9 H, s, But); C (100 MHz) 174.2 (C=O), 144.7 (2 × C(quat) of aromatic), 136.5 (2 × CH of aromatic), 119.2, (2 × CH of aromatic), 60.3 (C1 and C4), 38.9 (*C*Me3), 27.6 (C*Me3*), 27.3 (br, C2 and C3); *m/z* (EI+) 229 (M+, 1%), 117 (18), 84 (35), 57 (82), 49 (100) (Found: M + H+, 230.1544, C15H20NO requires 230.1545).

***N*-(Methoxycarbonyl)-1,2,3,4-tetrahydro-1,4-methanoisoquinoline 33b**

To a solution of alcohol **30b** (200 mg, 0.91 mmol) in CH2Cl2 (5 cm3) was added DMAP (333 mg, 2.7 mmol) and phenylchlorothionocarbonate (314 mg, 1.8 mmol). The reaction was stirred overnight under argon. MeOH (1 cm3) was added and the organic layer washed with 2 M HCl (2 × 5 cm3), the mixture extracted with CH2Cl2 (3 × 10 cm3), the combined organic extracts dried (MgSO4), and the solvent removed at reduced pressure. Column chromatography (SiO2, 30% Et2O : petroleum ether) gave thiobenzoate **31b** as a yellow oil (258 mg, 80%): *R*f (50% Et2O : petroleum ether) 0.41. The product was not fully characterised but instead was identified by a change in chemical shift of the CH-O proton from 4.0 in the starting alcohol to 5.1 ppm in the 1H NMR spectrum and an increase in the aromatic proton integral from 4 H to 9 H.A mixture of AIBN (59 mg, 0.36 mmol) and TTMSS (269 mg, 1.09 mmol) in toluene (2 cm3) was added over 100 min to a preheated solution of thiobenzoate **31b** (258 mg, 0.73 mmol) in toluene (18 cm3). The reaction was left at reflux for a further 30 min after completion of the addition, allowed to cool, and the solvent removed at reduced pressure. Column chromatography (10% Et2O : petroleum ether) gave **33b** as a colourless oil (115 mg, 78%); *R*f (50% Et2O : petroleum ether) 0.26; max(thin film)/cm-1 2988s, 2954s, 2887m, 1698s, 1449s, 1387s, 1310m, 1275m, 1252m, 1191m, 1154s, 1120m, 1101s, 759s; H (500 MHz, 1:1 mixture of rotamers) 7.38-7.08 (4 H, m, 4 × CH of aromatic), 5.17 and 5.04 (1 H, 2 × s, C(1)H), 3.69 and 3.59 (3 H, 2 × s, Me-O), 3.66 (1 H, s, C(4)H), 3.61-3.55 (1 H, m, C(3)H *exo*), 2.87 and 2.80 (1 H, 2 × d, *J* 9.0, C(3)H *endo*), 2.02 and 1.99 (1 H, 2 × d, *J* 9.0, C(9)H), 1.91 (1 H, d, *J* 9.0, C(9)H); C (125 MHz) 156.1 and 155.7 (C=O), 145.3 and 145.2, 144.0 and 143.9 (2 × C(quat) of aromatic), 127.1 and 127.0, 126.3 and 126.1, 121.5 and 121.2, 120.8 and 120.3 (4 × CH of aromatic), 61.5 and 61.1 (C1), 52.1 and 52.0 (Me-O), 48.8 and 48.7, 48.5 and 48.4 (C3 and C9), 44.4 and 43.8 (C3); *m/z* (EI+) 203 (M+, 20%), 128 (17), 116 (100), 84 (14), 59 (29), 49 (25) (Found: M + H+, 204.1026. C12H14NO2 requires 204.1024).

***N*-(*tert*-Butoxycarbonyl)-*anti*-9-ethyl-1,2,3,4-tetrahydro-1,4-methanoisoquinoline 33c**

Reaction of alcohol **30c** (200 mg, 0.69 mmol) according to the standard procedure gave an oil. Chromatography (SiO2, 10% Et2O : petroleum ether to 30 % Et2O : petroleum ether) gave xanthate **31c** (208 mg, 79%) as an oil : *R*f (25% Et2O : petroleum ether) 0.53. A mixture of AIBN (46 mg, 0.28 mmol) and TTMSS (205 mg, 0.83 mmol), in toluene (2 cm3), was added over 100 min to a preheated solution of xanthate **31c** (208 mg, 0.55 mmol) in toluene (16 cm3) at reflux. The reaction was left at reflux for a further 30 min after completion of the addition, allowed to cool, and the solvent removed at reduced pressure. Column chromatography (SiO2, 50% CH2Cl2 : petroleum ether) gave **33c** as a colourless oil (110 mg, 73%); *R*f (20% Et2O : petroleum ether) 0.33; max(thin film)/cm-1 2963s, 2929s, 2889s, 1694s, 1477s, 1455s, 1391s, 1363s, 1247m, 1174s, 1144s, 1103s, 864m; H (500 MHz, DMSO–d6, 90 oC) 7.33 (1 H, d, *J* 6.5, CH of aromatic), 7.25 (1 H, d, *J* 7.0, CH of aromatic), 7.23-7.13 (2 H, m, 2 × CH of aromatic), 4.73 (1 H, s, C(1)H), 3.48 (1 H, d, *J* 7.0, C(3)H *exo*), 3.42 (1 H, s, C(4)H), 2.64 (1 H, d, *J* 7.0, C(3)H *endo*), 2.34-2.28 (1 H, m, C(9)H), 1.37 (9 H, s, But), 0.97-0.86 (2 H, m, 2 × H of CH2), 0.85-0.78 (3 H, m, Me); C (100 MHz, 3:1 mixture of rotamers) 154.7 and 153.8 (C=O), 143.8 and 143.5 (C(quat) of aromatic), 142.3 (C(quat) of aromatic), 127.2 and 127.1, 126.0, 122.8 and 122.7, 121.6 and 121.2 (4 × CH of aromatic), 78.5 and 78.4 (*C*Me3), 64.0 and 62.6 (C1), 60.5 and 60.4 (C9), 49.4 and 49.3 (C4), 47.0 and 46.3 (C3), 28.1 and 28.0 (But), 19.3 (Me-*C*H2), 12.2 and 12.1(Me); *m/z* (CI+, NH3) 274 (M + H+, 24%), 235 (97), 218 (67), 174 (100), 144 (25) (Found: M + H+, 274.1813. C17H24NO2 requires 274.1807). 1D nOe experiment: irradiation of C(9)H at 2.30 ppm showed enhancement of the signal at 3.48 ppm, assigned as C(3)H *exo*, demonstrating that the proton attached to C9 is *syn* to nitrogen.

***N*-(*tert*-Butoxycarbonyl)-*endo,anti*-3,9-dimethyl-1,2,3,4-tetrahydro-1,4-methano isoquinoline 33d**

Reaction of alcohol **30d** (238 mg, 0.82 mmol) according to the standard procedure gave an oil. Chromatography (SiO2, 10% Et2O : petroleum ether) gave xanthate **31d** (244 mg, 78%) as an oil : *R*f (30% Et2O : petroleum ether) 0.53. A mixture of AIBN (77 mg, 0.47 mmol) and TTMSS (316 mg, 1.28 mmol), in toluene (4 cm3), was added over 70 min to a preheated solution of xanthate **31d** (244 mg, 0.64 mmol) in toluene (14 cm3) at reflux. The reaction was left at reflux for a further 30 min after completion of the addition, allowed to cool, and the solvent removed at reduced pressure. Column chromatography (SiO2, 50% CH2Cl2 : petroleum ether to 100% CH2Cl2) gave **33d** as a colourless oil (155 mg, 89%) ; *R*f (20% Et2O : petroleum ether) 0.40; max(thin film)/cm-1 2972s, 2929s, 2876s, 1694s, 1478s, 1459s, 1394s, 1343s, 1289s, 1246s, 1178s, 1142s, 1095s, 871m ; H (400 MHz, 2:1 mixture of rotamers) 7.36-7.30 (1 H, m, CH of aromatic), 7.28-7.21 (1 H, m, CH of aromatic), 7.20-7.13 (2 H, m, 2 × CH of aromatic), 4.90 and 4.72 (1 H, 2 × s, C(1)H), 4.03 and 3.96 (1 H, 2 × br s, C(3)H), 3.11 (1 H, s, C(4)H), 2.55-2.49 (1 H, m, C(9)H), 1.46 and 1.42 (9 H, 2 × s, But), 0.82 and 0.76 (3 H, 2 × d, *J* 6.0, 3-Me), 0.66 (3 H, d, *J* 6.0, 9-Me); C (100 MHz, CDCl3) 154.7 and 153.8 (C=O), 143.2 and 143.1 (C(quat) of aromatic), 142.0 (C(quat) of aromatic), 126.7, 126.4 (2 × C of aromatic; rotamer signals superposed), 125.1 and 124.9, 122.4 and 121.8, (2 × CH of aromatic), 79.1 and 78.9 (*C*Me3), 66.9 and 65.8 (C1), 56.0 and 55.5 (C4), 54.8 (C9), 54.6 and 54.0 (C3), 28.4 and 28.3 (But), 18.0 and 16.9 (3-Me), 11.9 (9-Me); *m/z* (CI+, NH3) 274 (M + H+, 28%), 235 (90), 218 (73), 174 (100), 130 (32) (Found: M + H+, 274.1795, C17H24NO2 requires 274.1807). 1D nOe experiment: irradiation of C(9)H at 2.52 ppm showed enhancement of both signals at 4.03 and 3.96 ppm, assigned as C(3)H, demonstrating that the protons attached to C9 and C3 are *syn* to one another. Irradiation of C(3)H also gave enhancement of the C(9)H signal.

***N*-(*tert*-Butoxycarbonyl)-6,7-dimethoxy-1,2,3,4-tetrahydro-1,4-iminonaphthalene 32e** and ***N*-(*tert*-Butoxycarbonyl)-6,7-dimethoxy-1,2,3,4-tetrahydro-1,4-methanoisoquinoline 33e**

Reaction of alcohol **30e** (140 mg, 0.43 mmol) according to the standard procedure gave an oil. Chromatography (SiO2, 50% Et2O : petroleum ether) gave xanthate **31e** (137 mg, 77%) as an oil : *R*f (50% Et2O : petroleum ether) 0.24. A mixture of AIBN (28 mg, 0.17 mmol) and TTMSS (124 mg, 0.50 mmol) in toluene (2 cm3) was added over 100 min to a preheated solution of xanthate **31e** (137 mg, 0.33 mmol) in toluene (8 cm3) at reflux. The reaction was left at reflux for a further 30 min after completion of the addition, allowed to cool, and the solvent removed at reduced pressure. Column chromatography (SiO2, 40% Et2O : petroleum ether) first gave **32e** as a colourless oil (13 mg, 13%); data as above. Second to elute was **33e** as a colourless oil (79 mg, 78%); *R*f (40% Et2O : petroleum ether) 0.15; max(thin film)/cm-1 2976s, 2886s, 1694s, 1613s, 1492s, 1392s, 1328s, 1298s, 1251s, 1217s, 1183s, 1145s, 1119s, 1092s, 1070s, 1020m, 916m, 855s; H (400 MHz, 3 : 2 mixture of rotamers) 6.96 and 6.83 (1 H, 2 × s, CH of aromatic), 6.89 (1 H, s CH of aromatic), 5.06 and 4.88 (1 H, 2 × s, C(1)H), 3.85 (6 H, s, 2 × Me), 3.55 (1 H, s, C(4)H), 3.50-3.43 (1 H, m, C(3)H *exo*), 2.75 and 2.67 (1 H, 2 × d, *J* 9.0, C(3)H *endo*), 1.97 and 1.92 (1 H, 2 × d, *J* 9.0, C(9)H), 1.84 (1 H, d, *J* 9.0, C(9)H), 1.41 and 1.35 (9 H, 2 × s, But); C (100 MHz) 155.6 and 154.8 (C=O), 148.2 and 147.9, 147.8 and 147.2, 137.6 and 137.5, 136.7 and 136.5 (4 × C(quat) of aromatic), 106.3 and 105.9 (CH of aromatic), 105.6 and 105.4 (CH of aromatic), 80.4 (*C*Me3), 62.2 and 61.0 (C1), 56.2 and 56.1 (2 × Me-O), 48.9 and 48.6 (C3), 48.8 (C9), 44.6 and 44.0 (C4), 28.7 and 28.5 (But); *m/z* (CI+, NH3) 323 (M + NH4+, 3%), 306 (M + H+, 23), 250 (100), 232 (53), 206 (35), 191 (17) (Found: M + H+, 306.1710. C17H24NO4 requires 306.1705).

***N*-(*tert*-Butoxycarbonyl)-6,7-difluoro-1,2,3,4-tetrahydro-1,4-methanoisoquinoline 33f**

Reaction of alcohol **30f** (144 mg, 0.48 mmol) according to the standard procedure gave an oil. Chromatography (SiO2, 10% Et2O : petroleum ether to 15 % Et2O : petroleum ether, gradient elution) gave xanthate **31f** (150 mg, 79%) as an oil : *R*f (25% Et2O : petroleum ether) 0.33. A mixture of AIBN (33 mg, 0.20 mmol) and TTMSS (143 mg, 0.58 mmol), in toluene (2 cm3), was added over 100 min to a preheated solution of xanthate **31f** (150 mg, 0.39 mmol) in toluene (9 cm3) at reflux. The reaction was left at reflux for a further 30 min after completion of the addition, allowed to cool, and the solvent removed at reduced pressure. Column chromatography (SiO2, 15% Et2O : petroleum ether) gave **33f** as a colourless oil (70 mg, 64%) ; *R*f (20% Et2O : petroleum ether) 0.22; max(thin film)/ cm-1 2977s, 2890s, 1694s, 1614s, 1478s, 1392s, 1363s, 1276s, 1249s, 1149s, 1046s, 1008m, 867s; H (400 MHz, 2 : 1 mixture of rotamers) 7.19-6.95 (2 H, m, 2 × CH of aromatic), 5.04 and 4.90 (1 H, 2 × br s, C(1)H), 3.59 (1 H, s, C(4)H), 3.51 (1 H, dd, *J* 9.0 and 3.0, C(3)H *exo*), 2.79 and 2.70 (1 H, 2 × d, *J* 9.0, C(3)H *endo*), 2.07-1.93 (1 H, m, C(9)H), 1.87 (1 H, d, *J* 9.0, C(9)H), 1.43 and 1.35 (9 H, 2 × s, But); C (100 MHz) 155.2 and 154.8 (C=O), 149.4 (dd, *J* 245 and 12, C-F), 148.8 (dd, *J* 245 and 13, C-F), 141.2, 140.2 (2 × C(quat) of aromatic), 111.4 and 111.0 (2 × d, *J* 20, CH of aromatic), 110.7 and 109.8 (2 × d, *J* 20, CH of aromatic), 79.7 (*C*Me3), 61.4 and 60.3 (C1), 48.8 and 48.6 (C3), 48.2 (C9), 44.3 and 44.0 (C4), 28.5 and 28.3 (But); 19F (235 MHz) 140.2 (d, *J* 19, CF), 140.5 (d, *J* 20, CF), 141.3 (d, *J* 20, CF), 141.5 (d, *J* 19, CF); *m/z* (CI+, NH3) 299, (M + NH4+, 5%), 282 (M + H+, 15), 243 (62), 226 (22), 182 (100), 152 (24) (Found: M + H+, 282.1305. C15H18F2NO2 requires 282.1306).

***N*-(*tert*-Butoxycarbonyl)-1,2,3,4-tetrahydro-1,4-methano-2-azaanthracene 33g**

Reaction of alcohol **30g** (227 mg, 0.73 mmol) according to the standard procedure gave an oil. Chromatography (SiO2, 5% Et2O : petroleum ether to 10% Et2O : petroleum ether) gave xanthate **31g** (185 mg, 63%) as an oil: *R*f (20% Et2O : petroleum ether) 0.40. AIBN (40 mg, 0.24 mmol) and TTMSS (172 mg, 0.69 mmol) in toluene (2 cm3) were added to a pre-heated solution of xanthate **31g** (185 mg, 0.46 mmol) in toluene at reflux (14 cm3) over 100 min. The reaction was left for a further 30 min at reflux, allowed to cool and then the solvent removed at reduced pressure. Chromatography (SiO2, 10% Et2O : petroleum ether) gave the product **33g** as a white solid (115 mg, 84%): *R*f (10% Et2O : petroleum ether) 0.21; mp (from petroleum ether) 130-132 oC (Found: C, 77.3; H, 7.3; N, 4.8. C19H21NO2 requires C, 77.3; H, 7.2; N, 4.7%); max(KBr)/cm-1 2987s, 2960m, 2930m, 1681s, 1367s, 1284m, 1150s, 1090s, 865m; H (500 MHz, DMSO-d6, 90 oC), 7.89-7.84 (2 H, m, 2 x CH of aromatic), 7.78 (1 H, s, CH of aromatic), 7.68 (1 H, s, CH of aromatic), 7.47-7.44 (2 H, m, 2 × CH of aromatic), 5.08 (1 H, s, C(1)H), 3.78 (1 H, s, C(4)H), 3.58 (1 H, dd, *J* 9.0 and 3.0, C(3)H *exo*), 2.81 (1 H, dd, *J* 9.0 and 3.0, C(3)H *endo*), 2.10 (1 H, d, *J* 9.0, C(11)H), 1.88 (1 H, d, *J* 9.0, C(11)H), 1.37 (9 H, s, But); C (125 MHz, DMSO-d6, 90 oC) 155.2 (C=O), 144.8, 143.4, 133.8, 133.2 (4 × C(quat) of aromatic) 128.9, 128.6, 126.3, 126.1, 120.3, 118.8 (6 × CH of aromatic), 79.5 (*C*Me3), 61.6 (C1), 50.4, 48.1 (C3 and C11), 44.2 (C4), 29.1 (C*Me3*); *m/z* (CI+, NH3) 313 (M + NH4+, 10%), 296 (M + H+, 8), 257 (100), 196 (M + H – Boc+, 63), 166 (12) (Found: M + H+, 296.1648. C19H22NO2 requires 296.1650).
